# Supplementary material for: Analysis of predicted loss-of-function variants in UK Biobank identifies variants protective for disease
Source: PubMed Central journal article supplement (PMC5915445; doi:10.1038/s41467-018-03911-8), 2018-04-24
Supplement: 41467_2018_3911_MOESM1_ESM.pdf [file 41467_2018_3911_MOESM1_ESM.pdf]

## **Supplementary Information**

Emdin et al. Analysis of predicted loss of function variants in UK Biobank identifies variants protective for disease.

Supplementary Table 1. Characteristics of individuals in UK Biobank.

|                                             | European Ancestry | Non-European Ancestry |
|---------------------------------------------|-------------------|-----------------------|
| N Individuals                               | 335660            | 69909                 |
| Age $\pm$ SD, years                         | 57 $\pm$ 8        | 55 $\pm$ 8            |
| Male, n (%)                                 | 155753 (46%)      | 31440 (45%)           |
| UK BiLEVE Array, n (%)                      | 43 528 (13%)      | 5097 (7%)             |
| Systolic Blood Pressure $\pm$ SD, mm Hg*    | 143 $\pm$ 22      | 140 $\pm$ 22          |
| Diastolic Blood Pressure $\pm$ SD, mm Hg*   | 84 $\pm$ 12       | 84 $\pm$ 12           |
| Body Mass Index $\pm$ SD, kg/m <sup>2</sup> | 27 $\pm$ 5        | 27 $\pm$ 5            |
| Waist-to-Hip Ratio $\pm$ SD                 | 0.87 $\pm$ 0.09   | 0.87 $\pm$ 0.09       |
| Coronary Heart Disease, n (%)               | 12445 (3.7%)      | 2360 (3.3%)           |

Abbreviations: SD, standard deviation

Supplementary Table 2. Characteristics of genes identified in low frequency (<5%) predicted loss-of-function variant analysis.

| Gene     | Description of Gene                                                                                                                                                                                                                                                                                                                     |
|----------|-----------------------------------------------------------------------------------------------------------------------------------------------------------------------------------------------------------------------------------------------------------------------------------------------------------------------------------------|
| FLG      | FLG encodes filaggrin, a protein which crosslinks keratin fibers to form a protein-lipid matrix in the epidermis which prevents water loss and infection. Loss of function variants in FLG have been identified as a cause of atopic dermatitis. <sup>7</sup>                                                                           |
| HLA-DQB1 | HLA-DQB1 encodes the beta 1 subunit of the class II major histocompatibility complex, present on antigen-presenting cells to display antigens. Polymorphisms in this gene are associated with a range of autoimmune disorders. <sup>8</sup>                                                                                             |
| IL33     | IL33 encodes interleukin-33, a cytokine that is an inducer of T helper 2 cell responses. Injection of IL33 into mice induces eosinophilia. Expression of IL33 is elevated among individuals with severe asthma. <sup>9</sup>                                                                                                            |
| GPR151   | <i>GPR151</i> encodes a G-protein coupled receptor of unknown function whose expression seems limited to the central nervous system. Of note, recent lineage tracing studies have localized connections to hypothalamic neurons, a region of the brain important in the control of appetite. <sup>10</sup>                              |
| PKHD1L1  | PKHD1L1 encodes fibrocystin-L, a large (446 kilodalton protein) predicted to have a single transmembrane domain. Fibrocystin-L is homologous to PKHD1, the autosomal recessive polycystic kidney disease gene, but is of unknown function. <sup>11</sup>                                                                                |
| ENPEP    | ENPEP encodes glutamyl aminopeptidase, an enzyme that degrades angiotensin II and promotes vasodilation. <sup>12</sup>                                                                                                                                                                                                                  |
| BTN3A2   | BTN3A2 encodes a butyrophilin family member. Other butyrophilin family members regulate T cell activation <sup>13</sup> and variants in BTN3A2 have been reported to be associated with gastric cancer <sup>14</sup> and hepatitis C infection. <sup>15</sup> However, the function of BTN3A2 is unclear. <sup>15</sup>                 |
| TMC3     | TMC3 encodes transmembrane channel-like 3, a protein homologous to a known ion channel but of unclear function. <sup>16</sup>                                                                                                                                                                                                           |
| PDE11A   | PDE11A encodes phosphodiesterase 11A which hydrolyzes both cAMP and cGMP and is expressed in skeletal muscle, prostate, kidney, liver, pituitary, and salivary glands and testis. <sup>17</sup> Loss of function variants in phosphodiesterase 11A have been identified as a cause of adrenocortical hyperplasia. <sup>18</sup>         |
| CLHC1    | CLHC1 encodes clathrin heavy chain linker domain containing 1, a protein of unknown function.                                                                                                                                                                                                                                           |
| CCDC66   | CCDC66 encodes coiled-coil domain containing 66 is a widely expressed protein of uncertain function. Loss of function variants in coiled-coil domain containing 66 have been reported to cause retinal degeneration and dysfunction in mice. <sup>19</sup>                                                                              |
| DAP      | DAP encodes death-associated protein 1, a small cytosolic mediator of interferon-gamma induced cell death. <sup>20</sup> Reduced expression of death-associated protein 1 in tumor tissues has been associated with an increased risk of death in colorectal cancer patients <sup>21</sup> and in breast cancer patients. <sup>22</sup> |
| TRIM40   | TRIM40 encodes tripartite motif containing 40, a member of the tripartite motif containing family which have been reported to have roles in ubiquitination. TRIM40 has been reported to prevent inflammation in the gastrointestinal tract                                                                                              |

|         |                                                                                                                                                                                                                                                                                                                                                                                                                                                                                                                                                                                                                                                                                                                                                                                                                                                             |
|---------|-------------------------------------------------------------------------------------------------------------------------------------------------------------------------------------------------------------------------------------------------------------------------------------------------------------------------------------------------------------------------------------------------------------------------------------------------------------------------------------------------------------------------------------------------------------------------------------------------------------------------------------------------------------------------------------------------------------------------------------------------------------------------------------------------------------------------------------------------------------|
|         | by inhibiting nuclear factor-kappaB. <sup>23</sup>                                                                                                                                                                                                                                                                                                                                                                                                                                                                                                                                                                                                                                                                                                                                                                                                          |
| MICA    | MICA encodes MHC class I polypeptide-related sequence A, a protein that is highly expressed on the surface of intestinal epithelial cells during stress. <sup>24</sup> By binding to receptors on T cells and natural killer cells, MICA promotes a cytolytic response, thus inducing an anti-tumor response when expressed on tumor cells. <sup>24</sup> MICA has also been reported to be expressed by intestinal epithelial during cytomegalovirus infection <sup>25</sup> and in the intestinal epithelial of active celiac disease patients. <sup>26</sup>                                                                                                                                                                                                                                                                                             |
| PDE3B   | <i>PDE3B</i> encodes the gene phosphodiesterase 3B, an adipocyte-expressed enzyme that hydrolyzes cyclic adenosine monophosphate (cAMP) and inhibits lipolysis in response to insulin binding to the insulin receptor. <sup>27</sup> <i>PDE3B</i> knockout mice have been reported to have reduced aortic atherosclerosis and markers of inflammation. <sup>28</sup> Furthermore, <i>PDE3B</i> knockout reduced infarct size in a mouse coronary artery ligation model of myocardial infarction. <sup>29</sup> Of note, cilostazol is an approved medicine that is a non-selective pharmacologic inhibitor of both phosphodiesterase 3B and the related isoform phosphodiesterase 3A. <sup>29</sup> In a small 211 participant randomized trial, cilostazol significantly reduced restenosis after percutaneous coronary balloon angioplasty. <sup>30</sup> |
| APOLD1  | APOLD1 encodes apolipoprotein L domain containing 1, a protein of unclear function. Apolipoprotein L domain containing 1 is expressed in vascular endothelial cells and has been reported to be induced in the endothelium by electrical or chemical stimulation. <sup>31</sup>                                                                                                                                                                                                                                                                                                                                                                                                                                                                                                                                                                             |
| IFIH1   | IFIH1 encodes interferon induced with helicase C domain 1, a cytoplasmic receptor that induces interferon signaling upon binding to viral RNA. <sup>32</sup> Gain of function mutations in IFIH1 cause Aicardi-Goutières syndrome, a rare genetic disorder characterized by lymphocytosis in the cerebral spinal fluid and cerebral atrophy. <sup>32</sup> Common variants in the <i>IFIH1</i> locus have previously been identified as associated with psoriasis <sup>33</sup> and vitiligo <sup>34</sup> , while rare pLOF variants in <i>IFIH1</i> have been associated with a reduced risk of type 1 diabetes <sup>35</sup> .                                                                                                                                                                                                                           |
| ZKSCAN3 | ZKSCAN3 (zinc finger with KRAB and SCAN domains 3) encodes a zinc finger family DNA binding protein. ZKSCAN3 represses transcription of autophagy genes <sup>36</sup> and is upregulated in human colon cancer cells. <sup>37</sup>                                                                                                                                                                                                                                                                                                                                                                                                                                                                                                                                                                                                                         |
| EGFL8   | EGFL8 encodes epidermal growth factor like 8, a gene of unknown function.                                                                                                                                                                                                                                                                                                                                                                                                                                                                                                                                                                                                                                                                                                                                                                                   |
| GEM     | GEM encodes a GTP binding protein induced in T-cells in response to mitogen stimulation. <sup>38</sup> GEM has been reported to down regulate voltage gated calcium channel activity. <sup>39</sup> The physiologic function of GEM is unclear.                                                                                                                                                                                                                                                                                                                                                                                                                                                                                                                                                                                                             |
| PYGM    | PYGM encodes glycogen phosphorylase, an enzyme expressed in skeletal muscle that hydrolyzes glycogen into glucose-1-phosphate for energy during exercise. <sup>40</sup> Homozygous loss of function variants in PYGM cause McArdle disease, which is characterized by the presence of muscle pain and weakness upon exercise that is immediately relieved upon stopping and the absence of lactate formation during exercise. <sup>41</sup>                                                                                                                                                                                                                                                                                                                                                                                                                 |

Supplementary Table 3. Common ( $\geq 5\%$  frequency) loss of function variants significantly associated with traits and disease in UK Biobank.

| Outcome  | Gene    | Variant     | Location     | EA | RA | Consequence                      | Frequency<br>(%, European) | Beta  | SE    | P-value                | Novel?          | MHC Locus? |
|----------|---------|-------------|--------------|----|----|----------------------------------|----------------------------|-------|-------|------------------------|-----------------|------------|
| Asthma   | GSDMB   | rs11078928  | 17:38064469  | C  | T  | Splice Acceptor<br>(c.662-2A>G)  | 46                         | -0.10 | 0.007 | $6.66 \times 10^{-50}$ | No <sup>1</sup> | No         |
| Asthma   | BTN3A2  | rs71557335  | 6:26368279   | A  | G  | Splice Donor<br>(c.-6+1G>A)      | 13                         | 0.06  | 0.010 | $1.67 \times 10^{-8}$  | Yes             | Yes        |
| Asthma   | CCHCR1  | rs72856718  | 6:31125257   | A  | C  | p.Glu41Ter                       | 7                          | -0.13 | 0.015 | $2.06 \times 10^{-18}$ | Yes             | Yes        |
| BMI      | IQCK    | rs4782272   | 16:19729016  | C  | G  | Splice Acceptor<br>(c.-612-1G>C) | 18                         | -0.02 | 0.003 | $1.12 \times 10^{-10}$ | Yes             | No         |
| BMI      | ANKDD1B | rs34358     | 5:74965122   | A  | G  | p.Trp480Ter                      | 36                         | -0.03 | 0.002 | $5.94 \times 10^{-30}$ | No <sup>2</sup> | No         |
| CHD      | MOB3C   | rs6671527   | 1:47080679   | A  | G  | p.Arg24Ter                       | 47                         | -0.03 | 0.006 | $2.31 \times 10^{-7}$  | Yes             | No         |
| CHD      | LPL     | rs328       | 8:19819724   | G  | C  | p.Ser474Ter                      | 10                         | -0.07 | 0.010 | $1.62 \times 10^{-11}$ | No <sup>3</sup> | No         |
| DBP      | OR4X2   | rs7120775   | 11:48266736  | G  | C  | p.Tyr27Ter                       | 15                         | -0.02 | 0.003 | $1.49 \times 10^{-12}$ | Yes             | No         |
| DBP      | OR4C11  | rs75423534  | 11:55371381  | A  | G  | p.Gln157Ter                      | 11                         | -0.02 | 0.004 | $2.69 \times 10^{-9}$  | Yes             | No         |
| DBP      | CFL1    | rs1939212   | 11:65626701  | T  | C  | Splice Donor<br>(c.-532+1G>A)    | 30                         | 0.01  | 0.003 | $9.09 \times 10^{-8}$  | Yes             | No         |
| DBP      | FUT2    | rs601338    | 19:49206674  | A  | G  | p.Trp154Ter                      | 50                         | -0.02 | 0.002 | $6.05 \times 10^{-11}$ | Yes             | No         |
| DBP      | BTN3A2  | rs71557335  | 6:26368279   | A  | G  | Splice Donor<br>(c.-6+1G>A)      | 13                         | -0.02 | 0.003 | $2.36 \times 10^{-8}$  | Yes             | Yes        |
| FEV1/FVC | BTN3A2  | rs71557335  | 6:26368279   | A  | G  | Splice Donor<br>(c.-6+1G>A)      | 13                         | -0.02 | 0.003 | $1.19 \times 10^{-7}$  | Yes             | Yes        |
| FEV1/FVC | ZSCAN9  | rs76542212  | 6:28198122   | T  | C  | p.Arg193Ter                      | 7                          | 0.02  | 0.005 | $5.07 \times 10^{-8}$  | Yes             | Yes        |
| FEV1/FVC | CCHCR1  | rs3130453   | 6:31124849   | T  | C  | p.Trp78Ter                       | 49                         | -0.02 | 0.002 | $7.92 \times 10^{-12}$ | Yes             | Yes        |
| FEV1/FVC | CCHCR1  | rs72856718  | 6:31125257   | A  | C  | p.Glu41Ter                       | 7                          | 0.03  | 0.005 | $4.32 \times 10^{-9}$  | Yes             | Yes        |
| Height   | AKR1E2  | rs12240276  | 10:4889403   | T  | C  | p.Arg301Ter                      | 11                         | -0.02 | 0.002 | $6.19 \times 10^{-15}$ | Yes             | No         |
| Height   | PATE4   | rs11220236  | 11:125707761 | C  | A  | Splice Acceptor<br>(c.59-2A>C)   | 41                         | -0.01 | 0.002 | $1.09 \times 10^{-8}$  | Yes             | No         |
| Height   | OR4X2   | rs7120775   | 11:48266736  | G  | C  | p.Tyr27Ter                       | 15                         | 0.02  | 0.003 | $1.08 \times 10^{-8}$  | No <sup>4</sup> | No         |
| Height   | DYX1C1  | rs57809907  | 15:55722882  | A  | C  | p.Glu417Ter                      | 10                         | -0.02 | 0.003 | $2.30 \times 10^{-9}$  | Yes             | No         |
| Height   | TBC1D29 | rs111780165 | 17:28887134  | A  | G  | Splice Acceptor<br>(c.13-1G>A)   | 7                          | -0.06 | 0.004 | $3.47 \times 10^{-40}$ | No <sup>4</sup> | No         |
| Height   | SLC35G6 | rs7214088   | 17:7386280   | A  | G  | p.Trp326Ter                      | 26                         | 0.03  | 0.003 | $3.49 \times 10^{-37}$ | No <sup>4</sup> | No         |
| Height   | ACYP2   | rs1363061   | 2:54284441   | A  | G  | p.Trp74Ter                       | 11                         | -0.02 | 0.003 | $4.28 \times 10^{-9}$  | Yes             | No         |

|                |         |            |             |   |   |                                  |    |       |       |                        |                 |     |
|----------------|---------|------------|-------------|---|---|----------------------------------|----|-------|-------|------------------------|-----------------|-----|
| Height         | CPN2    | rs4974539  | 3:194061907 | A | G | p.Gln509Ter                      | 38 | -0.01 | 0.002 | 1.88*10 <sup>-8</sup>  | Yes             | No  |
| Height         | OR2J1   | rs2394517  | 6:29069299  | T | C | p.Gln194Ter                      | 41 | -0.03 | 0.002 | 5.21*10 <sup>-41</sup> | No <sup>4</sup> | Yes |
| Height         | CCHCR1  | rs72856718 | 6:31125257  | A | C | p.Glu41Ter                       | 7  | -0.05 | 0.004 | 4.38*10 <sup>-36</sup> | No <sup>4</sup> | Yes |
| Hypothyroidism | BTN3A2  | rs71557335 | 6:26368279  | A | G | Splice Donor<br>(c.-6+1G>A)      | 13 | 0.09  | 0.014 | 4.88*10 <sup>-10</sup> | Yes             | Yes |
| Hypothyroidism | CCHCR1  | rs72856718 | 6:31125257  | A | C | p.Glu41Ter                       | 7  | 0.14  | 0.018 | 4.33*10 <sup>-14</sup> | No <sup>5</sup> | Yes |
| Psoriasis      | OR2J1   | rs2394517  | 6:29069299  | T | C | p.Gln194Ter                      | 41 | 0.13  | 0.019 | 2.46*10 <sup>-12</sup> | No <sup>6</sup> | Yes |
| Psoriasis      | CCHCR1  | rs3130453  | 6:31124849  | T | C | p.Trp78Ter                       | 49 | 0.34  | 0.019 | 1.54*10 <sup>-71</sup> | No <sup>6</sup> | Yes |
| SBP            | OR4X2   | rs7120775  | 11:48266736 | G | C | p.Tyr27Ter                       | 15 | -0.03 | 0.003 | 9.37*10 <sup>-16</sup> | Yes             | No  |
| SBP            | OR4C11  | rs75423534 | 11:55371381 | A | G | p.Gln157Ter                      | 11 | -0.03 | 0.004 | 3.04*10 <sup>-10</sup> | Yes             | No  |
| SBP            | CFL1    | rs1939212  | 11:65626701 | T | C | Splice Donor<br>(c.-532+1G>A)    | 30 | 0.02  | 0.003 | 8.32*10 <sup>-10</sup> | Yes             | No  |
| SBP            | TNK1    | rs7220814  | 17:7290695  | G | A | Splice Acceptor<br>(c.1398-2A>G) | 6  | -0.02 | 0.005 | 1.89*10 <sup>-7</sup>  | Yes             | No  |
| SBP            | FUT2    | rs601338   | 19:49206674 | A | G | p.Trp154Ter                      | 50 | -0.02 | 0.002 | 3.87*10 <sup>-11</sup> | Yes             | No  |
| WHRadjBMI      | SLC35G6 | rs7214088  | 17:7386280  | A | G | p.Trp326Ter                      | 26 | 0.01  | 0.003 | 4.01*10 <sup>-7</sup>  | Yes             | No  |
| WHRadjBMI      | BTN3A2  | rs71557335 | 6:26368279  | A | G | Splice Donor<br>(c.-6+1G>A)      | 13 | -0.02 | 0.003 | 4.06*10 <sup>-13</sup> | Yes             | Yes |

Abbreviations: EA, effect allele; RA, reference allele; SE, standard error

<sup>1</sup>Variant identified as independent in sequential conditional analysis.

Supplementary Table 4. Variants previously reported in genome wide association studies within the same loci as identified low frequency loss of function variants.

| Outcome        | Gene     | Rare Variant | Location    | Frequency (% European) | Previous Variant in Locus? | Variant   | Location    | Frequency (%) |
|----------------|----------|--------------|-------------|------------------------|----------------------------|-----------|-------------|---------------|
| Asthma         | FLG      | rs61816761   | 1:152285861 | 1.51                   | No                         |           |             |               |
| Asthma         | HLA-DQB1 | rs28688207   | 6:32628660  | 3.14                   | Yes <sup>2</sup>           | rs9273349 | 6:32733847  | 42            |
| Asthma         | IL33     | rs146597587  | 9:6255967   | 0.44                   | Yes <sup>2</sup>           | rs1342326 | 9:6180076   | 16            |
| BMI            | GPR151   | rs114285050  | 5:145895394 | 0.78                   | No                         |           |             |               |
| BMI            | PKHD1L1  | rs533623778  | 8:110523131 | 1.0*10 <sup>-4</sup>   | No                         |           |             |               |
| DBP            | ENPEP    | rs33966350   | 4:111431444 | 1.19                   | No                         |           |             |               |
| DBP            | BTN3A2   | rs58367598   | 6:26370833  | 3.75                   | No                         |           |             |               |
| DBP            | TMC3     | rs150843673  | 15:81624929 | 2.14                   | No                         |           |             |               |
| Height         | PDE11A   | rs76308115   | 2:178879181 | 0.52                   | Yes <sup>3</sup>           | rs3821008 | 2:178682329 | 12            |
| Height         | CLHC1    | rs114931154  | 2:55407644  | 1.26                   | No                         |           |             |               |
| Height         | CCDC66   | rs150364083  | 3:56628033  | 0.58                   | Yes <sup>3</sup>           | rs9835332 | 3:56642722  | 46            |
| Height         | DAP      | rs201354802  | 5:10761153  | 0.24                   | No                         |           |             |               |
| Height         | TRIM40   | rs115651142  | 6:30115320  | 0.63                   | Yes <sup>3</sup>           | rs9404952 | 6:29912144  | 44            |
| Height         | MICA     | rs181430930  | 6:31378575  | 0.26                   | Yes <sup>3</sup>           | rs6457374 | 6:31380240  | 27            |
| Height         | PDE3B    | rs150090666  | 11:14865399 | 0.06                   | No                         |           |             |               |
| Height         | APOLD1   | rs202116412  | 12:12879031 | 0.03                   | Yes <sup>3</sup>           | rs1420023 | 12:12767378 | 12            |
| Hypothyroidism | IFIH1    | rs35337543   | 2:163136505 | 1.45                   | Yes <sup>4,5</sup>         | rs1990760 |             |               |
| Psoriasis      | ZKSCAN3  | rs73387810   | 6:28318166  | 0.86                   | No                         |           |             |               |
| Psoriasis      | EGFL8    | rs141826798  | 6:32134395  | 0.53                   | Yes <sup>6</sup>           | rs4406273 | 6:31266090  | 26            |
| SBP            | ENPEP    | rs33966350   | 4:111431444 | 1.19                   | No                         |           |             |               |
| SBP            | GEM      | rs138582164  | 8:95264265  | 0.04                   | No                         |           |             |               |
| WHRadjBMI      | PYGM     | rs116987552  | 11:64527223 | 0.39                   | No                         |           |             |               |

Supplementary Table 5. Variants previously reported within the same loci as identified common loss of function variants.

| Outcome  | Gene    | Variant     | Location     | Frequency<br>(%, European) | Previous Variant in Locus? | Variant                | Location                       | Frequency (%) |
|----------|---------|-------------|--------------|----------------------------|----------------------------|------------------------|--------------------------------|---------------|
| Asthma   | GSDMB   | rs11078928  | 17:38064469  | 46                         | Yes <sup>2</sup>           | rs2305480              | 17:38062196                    | 45            |
| Asthma   | BTN3A2  | rs71557335  | 6:26368279   | 13                         | No                         |                        |                                |               |
| Asthma   | CCHCR1  | rs72856718  | 6:31125257   | 7                          | No                         |                        |                                |               |
| BMI      | IQCK    | rs4782272   | 16:19729016  | 18                         | Yes <sup>7</sup>           | rs11641786             | 16:19844865                    | 14            |
| BMI      | ANKDD1B | rs34358     | 5:74965122   | 36                         | Yes <sup>7</sup>           | rs253414               | 5:74956517                     | 34            |
| CHD      | MOB3C   | rs6671527   | 1:47080679   | 47                         | No                         |                        |                                |               |
| CHD      | LPL     | rs328       | 8:19819724   | 10                         | Yes <sup>8</sup>           | rs264                  | 8:19813180                     | 14            |
| DBP      | OR4X2   | rs7120775   | 11:48266736  | 15                         | No                         |                        |                                |               |
| DBP      | OR4C11  | rs75423534  | 11:55371381  | 11                         | No                         |                        |                                |               |
| DBP      | CFL1    | rs1939212   | 11:65626701  | 30                         | No                         |                        |                                |               |
| DBP      | FUT2    | rs601338    | 19:49206674  | 50                         | No                         |                        |                                |               |
| DBP      | BTN3A2  | rs71557335  | 6:26368279   | 13                         | No                         |                        |                                |               |
| FEV1/FVC | BTN3A2  | rs71557335  | 6:26368279   | 13                         | No                         |                        |                                |               |
| FEV1/FVC | ZSCAN9  | rs76542212  | 6:28198122   | 7                          | No                         |                        |                                |               |
| FEV1/FVC | CCHCR1  | rs3130453   | 6:31124849   | 49                         | Yes <sup>9</sup>           | rs2857595              | 6:31568469                     | 21            |
| FEV1/FVC | CCHCR1  | rs72856718  | 6:31125257   | 7                          | Yes <sup>9</sup>           | rs2857595<br>rs2281880 | 6:31568469<br>10:<br>104269217 | 21            |
| Height   | AKR1E2  | rs12240276  | 10:4889403   | 11                         | Yes <sup>10</sup>          |                        |                                | 46            |
| Height   | PATE4   | rs11220236  | 11:125707761 | 41                         | No                         |                        |                                |               |
| Height   | OR4X2   | rs7120775   | 11:48266736  | 15                         | Yes <sup>3</sup>           | rs10838835             | 11: 48246457                   | 12            |
| Height   | DYX1C1  | rs57809907  | 15:55722882  | 10                         | No                         |                        |                                |               |
| Height   | TBC1D29 | rs111780165 | 17:28887134  | 7                          | Yes <sup>10</sup>          | rs3816780              | 17:<br>29161358                | 11            |
| Height   | SLC35G6 | rs7214088   | 17:7386280   | 26                         | Yes <sup>3</sup>           | rs11658168             | 17: 7406134                    | 38            |
| Height   | ACYP2   | rs1363061   | 2:54284441   | 11                         | Yes <sup>3</sup>           | rs7588499              | 2:54728276                     | 48            |
| Height   | CPN2    | rs4974539   | 3:194061907  | 38                         | No                         |                        |                                |               |



|                |         |            |             |    |                   |           |            |    |
|----------------|---------|------------|-------------|----|-------------------|-----------|------------|----|
| Height         | OR2J1   | rs2394517  | 6:29069299  | 41 | Yes <sup>3</sup>  | rs3129109 | 6:29084232 | 37 |
| Height         | CCHCR1  | rs72856718 | 6:31125257  | 7  | Yes <sup>3</sup>  | rs2073724 | 6:31125257 | 5  |
| Hypothyroidism | BTN3A2  | rs71557335 | 6:26368279  | 13 | No                |           |            |    |
| Hypothyroidism | CCHCR1  | rs72856718 | 6:31125257  | 7  | Yes <sup>11</sup> | rs2517532 | 6:31126386 | 40 |
| Psoriasis      | OR2J1   | rs2394517  | 6:29069299  | 41 | No                |           |            |    |
| Psoriasis      | CCHCR1  | rs3130453  | 6:31124849  | 49 | Yes <sup>12</sup> | rs4406273 | 6:31266090 | 9  |
| SBP            | OR4X2   | rs7120775  | 11:48266736 | 15 | No                |           |            |    |
| SBP            | OR4C11  | rs75423534 | 11:55371381 | 11 | No                |           |            |    |
| SBP            | CFL1    | rs1939212  | 11:65626701 | 30 | No                |           |            |    |
| SBP            | TNK1    | rs7220814  | 17:7290695  | 6  | No                |           |            |    |
| SBP            | FUT2    | rs601338   | 19:49206674 | 50 | No                |           |            |    |
| WHRadjBMI      | SLC35G6 | rs7214088  | 17:7386280  | 26 | No                |           |            |    |
| WHRadjBMI      | BTN3A2  | rs71557335 | 6:26368279  | 13 | No                |           |            |    |

Supplementary Table 6. Frequency of loss of function homozygotes in UK Biobank and in gnoMAD.

| Gene          | Variant     | Number of Homozygotes |                |
|---------------|-------------|-----------------------|----------------|
|               |             | UK Biobank            | gnoMAD         |
| <i>GPR151</i> | rs114285050 | 30 of 405569          | 13 of 138592   |
| <i>GSDMB</i>  | rs11078928  | 85535 of 405569       | 14909 of 90689 |
| <i>IL33</i>   | rs146597587 | 5 of 405569           | 1 of 138239    |
| <i>IFIH1</i>  | rs35732034  | 41 of 405569          | 7 of 131469    |
| <i>PDE3B</i>  | rs150090666 | 0 of 405569           | 1 of 138583    |

Supplementary Table 7. Definitions of disease outcomes in UK Biobank.

| <b>Outcome</b>                                | <b>Definition (UK Biobank unless otherwise specified)</b>                                                                                                                                                                                                                                                                                                                                                                                                                                                                                                                                                                                                                                                                    |
|-----------------------------------------------|------------------------------------------------------------------------------------------------------------------------------------------------------------------------------------------------------------------------------------------------------------------------------------------------------------------------------------------------------------------------------------------------------------------------------------------------------------------------------------------------------------------------------------------------------------------------------------------------------------------------------------------------------------------------------------------------------------------------------|
| <b><i>Cardiometabolic disease</i></b>         |                                                                                                                                                                                                                                                                                                                                                                                                                                                                                                                                                                                                                                                                                                                              |
| Coronary heart disease                        | Inverse variance weighted fixed effects meta-analysis of CARDIOGRAM Exome Consortium <sup>42</sup> outcome (coronary heart disease) and UK Biobank outcome:<br>(1) Myocardial infarction (MI), coronary artery bypass grafting, or coronary artery angioplasty documented in medical history at time of enrollment by a trained nurse or<br>(2) Hospitalization for ICD-10 code for acute myocardial infarction (I21.0, I21.1, I21.2, I21.4, I21.9) or<br>(3) Hospitalization for OPCS-4 coded procedure: coronary artery bypass grafting (K40.1-40.4, K41.1-41.4, K45.1-45.5) or<br>(4) Hospitalization for OPCS-4 coded procedure: coronary angioplasty ± stenting (K49.1-49.2, K49.8-49.9, K50.2, K75.1-75.4, K75.8-75.9) |
| Type 2 Diabetes                               | History of diabetes unspecified, type 2 diabetes during verbal interview with trained nurse or hospitalization for or death due to ICD code E11                                                                                                                                                                                                                                                                                                                                                                                                                                                                                                                                                                              |
| Atrial fibrillation                           | History of atrial fibrillation or flutter during verbal interview with trained nurse or hospitalization for or death due to ICD code I48                                                                                                                                                                                                                                                                                                                                                                                                                                                                                                                                                                                     |
| Stroke                                        | History of stroke, adjudicated by UK Biobank centrally as report of stroke during verbal interview with trained nurse or hospitalization for or death due to ICD code I60-64 ( <a href="http://biobank.ctsu.ox.ac.uk/crystal/refer.cgi?id=462">http://biobank.ctsu.ox.ac.uk/crystal/refer.cgi?id=462</a> )                                                                                                                                                                                                                                                                                                                                                                                                                   |
| Heart failure                                 | (History of heart failure during verbal interview with trained nurse or hospitalization for or death due to ICD code I11.0, I13.0, I13.2, I125.5, I42, I50)                                                                                                                                                                                                                                                                                                                                                                                                                                                                                                                                                                  |
| Venous thromboembolism                        | History of venous thromboembolism, deep vein thrombosis or pulmonary embolism during verbal interview with trained nurse or hospitalization for death due to I26, I80.1, I80.2, I81, or I82.0                                                                                                                                                                                                                                                                                                                                                                                                                                                                                                                                |
| <b><i>Other diseases (&gt;5000 cases)</i></b> |                                                                                                                                                                                                                                                                                                                                                                                                                                                                                                                                                                                                                                                                                                                              |
| Allergic Rhinitis                             | History of allergic rhinitis/hayfever during verbal interview with trained nurse or hospitalization for or death due to ICD code J30                                                                                                                                                                                                                                                                                                                                                                                                                                                                                                                                                                                         |
| Asthma                                        | History of asthma during verbal interview with trained nurse                                                                                                                                                                                                                                                                                                                                                                                                                                                                                                                                                                                                                                                                 |
| Anxiety                                       | (History of anxiety/panic attacks during verbal interview with trained nurse or hospitalization for or death due to ICD code F41)                                                                                                                                                                                                                                                                                                                                                                                                                                                                                                                                                                                            |
| Breast cancer                                 | History of breast cancer during verbal interview with trained nurse or hospitalization for or death due to ICD code C50                                                                                                                                                                                                                                                                                                                                                                                                                                                                                                                                                                                                      |
| Cataract                                      | History of cataract during verbal interview with trained nurse or hospitalization for or death due to ICD code H25                                                                                                                                                                                                                                                                                                                                                                                                                                                                                                                                                                                                           |
| Cholelithiasis                                | History of gallstones during verbal interview with trained nurse or hospitalization for or death due to ICD code K56.3 or K80                                                                                                                                                                                                                                                                                                                                                                                                                                                                                                                                                                                                |
| Depression                                    | History of depression during verbal interview with trained nurse or hospitalization for or death due to ICD code F32                                                                                                                                                                                                                                                                                                                                                                                                                                                                                                                                                                                                         |
| Hypothyroidism                                | History of hypothyroidism during verbal interview with trained nurse or hospitalization for or death due to ICD code E03                                                                                                                                                                                                                                                                                                                                                                                                                                                                                                                                                                                                     |
| Gastric reflux                                | History of gastric reflux during verbal interview with trained nurse or hospitalization for or death due to ICD code K21                                                                                                                                                                                                                                                                                                                                                                                                                                                                                                                                                                                                     |
| Osteoporosis                                  | History of osteoporosis during verbal interview with trained nurse or hospitalization for or death due to ICD code M80 or M81                                                                                                                                                                                                                                                                                                                                                                                                                                                                                                                                                                                                |
| Osteoarthritis                                | History of osteoarthritis during verbal interview with trained nurse or hospitalization for or death due to ICD code M15-19                                                                                                                                                                                                                                                                                                                                                                                                                                                                                                                                                                                                  |
| Psoriasis                                     | History of psoriasis during verbal interview with trained nurse or hospitalization for or death due to ICD code L40                                                                                                                                                                                                                                                                                                                                                                                                                                                                                                                                                                                                          |

Abbreviations: ICD, international classification of disease

Supplementary Table 8. Predicted loss of function variants in PDE3B identified in the Myocardial Infarction Genetics Consortium.

| Variant             | Effect of Variant            | Carriers in Cases | Carriers in Controls |
|---------------------|------------------------------|-------------------|----------------------|
| 11:14666481_C/CTG   | Frameshift: p.Ile289Ter      | 0                 | 1                    |
| 11:14666497_G/GAGGA | Frameshift: p.Arg294Lys      | 0                 | 1                    |
| 11:14810650_A/G     | Splice Acceptor: c.1279-2A>G | 0                 | 1                    |
| 11:14839865_AT/A    | Frameshift: p.Ser554Leu      | 0                 | 1                    |
| 11:14840680_A/T     | Splice Acceptor: c.1734-2A>T | 1                 | 0                    |
| 11:14840732_CA/C    | Frameshift: p.Asp596Ile      | 1                 | 1                    |
| 11:14854304_G_T     | Stop Gained: p.Glu711Ter     | 0                 | 1                    |
| 11:14854367_C/T     | Stop Gained: p.Arg732Ter     | 1                 | 1                    |
| 11:14865399_C/T     | Stop Gained: p.Arg783Ter     | 8                 | 15                   |
| 11:14880600_C/A     | Stop Gain: p.Tyr844Ter       | 1                 | 0                    |
| 11:14882913_G/T     | Splice Donor: c.2886+1G>T    | 0                 | 1                    |

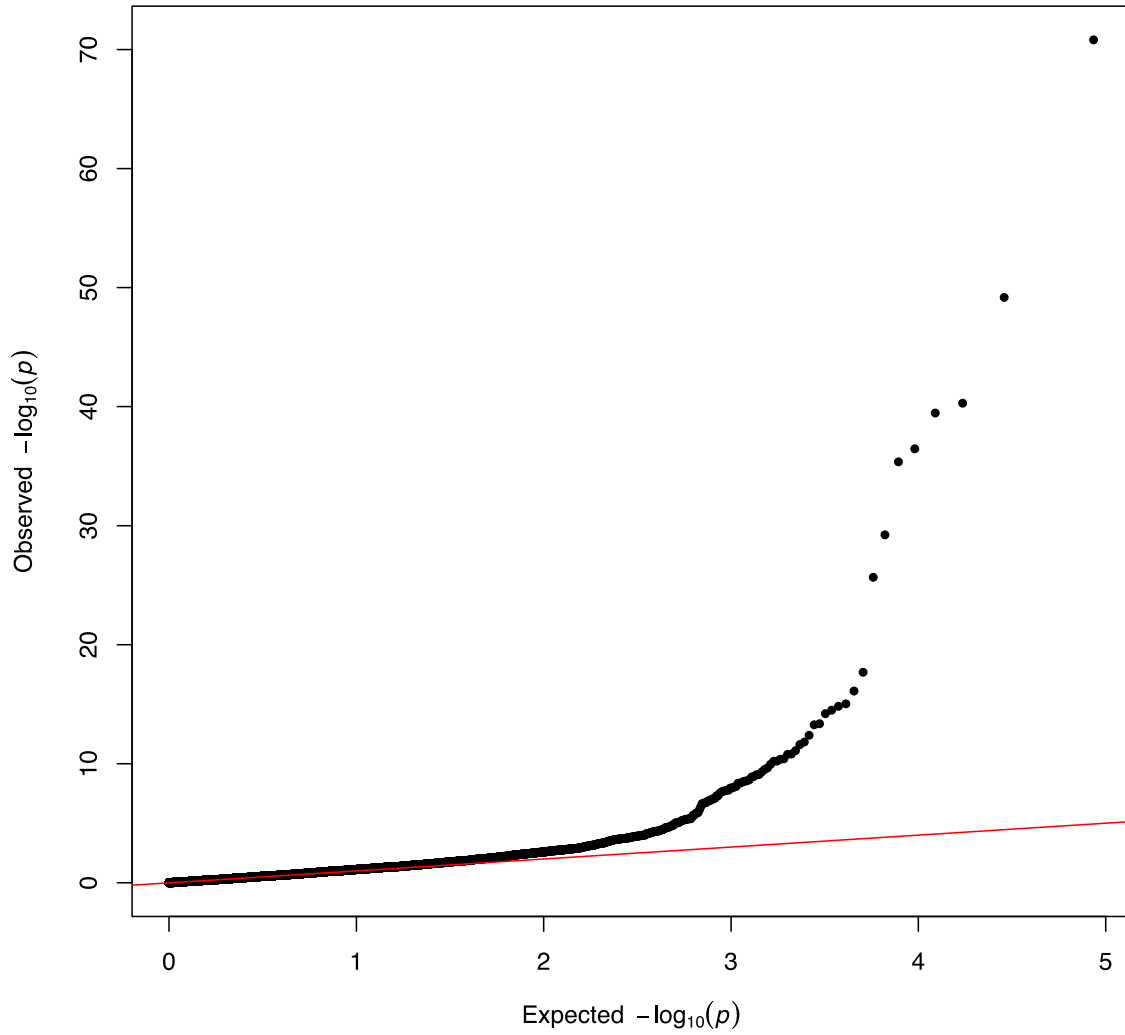

Supplementary Figure 1: Quantile-quantile plot for predicted loss-of-function analysis. No evidence of genomic inflation was observed ( $\lambda = 1.09$ ).

## References

1. Igartua C, Myers RA, Mathias RA, et al. Ethnic-specific associations of rare and low-frequency DNA sequence variants with asthma. *Nat Commun*. 2015;6:5965. doi:10.1038/ncomms6965.
2. Locke AE, Kahali B, Berndt SI, et al. Genetic studies of body mass index yield new insights for obesity biology. *Nature*. 2015;518(7538):197-206. doi:10.1038/nature14177.
3. Khera AV, Won H-H, Peloso GM, et al. Association of Rare and Common Variation in the Lipoprotein Lipase Gene With Coronary Artery Disease. *JAMA : the journal of the American Medical Association*. 2017;317(9):937-946. doi:10.1001/jama.2017.0972.
4. Wood AR, Esko T, Yang J, et al. Defining the role of common variation in the genomic and biological architecture of adult human height. *Nat Genet*. 2014;46(11):1173-1186. doi:10.1038/ng.3097.
5. Eriksson N, Tung JY, Kiefer AK, et al. Novel associations for hypothyroidism include known autoimmune risk loci. Sawalha AH, ed. *PLoS ONE*. 2012;7(4):e34442. doi:10.1371/journal.pone.0034442.
6. Tsoi LC, Spain SL, Knight J, Ellinghaus E, Stuart PE. Identification of 15 new psoriasis susceptibility loci highlights the role of innate immunity. *Nature*. 2012.
7. Palmer CNA, Irvine AD, Terron-Kwiatkowski A, et al. Common loss-of-function variants of the epidermal barrier protein filaggrin are a major predisposing factor for atopic dermatitis. *Nat Genet*. 2006;38(4):441-446. doi:10.1038/ng1767.
8. Fernando MMA, Stevens CR, Walsh EC, et al. Defining the role of the MHC in autoimmunity: a review and pooled analysis. Fisher EMC, ed. *PLoS Genet*. 2008;4(4):e1000024. doi:10.1371/journal.pgen.1000024.
9. Miller AM. Role of IL-33 in inflammation and disease. *Journal of Inflammation*. 2011;8(1):22. doi:10.1186/1476-9255-8-22.
10. Broms J, Grahm M, Haugegaard L, Blom T, Meletis K, Tingström A. Monosynaptic retrograde tracing of neurons expressing the G-protein coupled receptor Gpr151 in the mouse brain. *J Comp Neurol*. 2017;525(15):3227-3250. doi:10.1002/cne.24273.
11. Hogan MC, Griffin MD, Rossetti S, Torres VE, Ward CJ, Harris PC. PKHDL1, a homolog of the autosomal recessive polycystic kidney disease gene, encodes a receptor with inducible T lymphocyte expression. *Hum Mol Genet*. 2003;12(6):685-698.
12. Reaux A, Iturrioz X, Vazeux G, et al. Aminopeptidase A, which generates one of

the main effector peptides of the brain renin-angiotensin system, angiotensin III, has a key role in central control of arterial blood pressure. *Biochem Soc Trans.* 2000;28(4):435-440.

13. Arnett HA, Viney JL. Immune modulation by butyrophilins. *Nat Rev Immunol.* 2014;14(8):559-569. doi:10.1038/nri3715.
14. Zhu M, Yan C, Ren C, et al. Exome Array Analysis Identifies Variants in SPOCD1 and BTN3A2 That Affect Risk for Gastric Cancer. *Gastroenterology.* 2017;152(8):2011-2021. doi:10.1053/j.gastro.2017.02.017.
15. Ampuero J, del Campo JA, Rojas L, et al. Fine-mapping butyrophilin family genes revealed several polymorphisms influencing viral genotype selection in hepatitis C infection. *Genes Immun.* 2015;16(5):297-300. doi:10.1038/gene.2015.14.
16. Kurima K, Yang Y, Sorber K, Griffith AJ. Characterization of the transmembrane channel-like (TMC) gene family: functional clues from hearing loss and epidermodysplasia verruciformis. *Genomics.* 2003;82(3):300-308.
17. Fawcett L, Baxendale R, Stacey P, et al. Molecular cloning and characterization of a distinct human phosphodiesterase gene family: PDE11A. *Proc Natl Acad Sci USA.* 2000;97(7):3702-3707. doi:10.1073/pnas.050585197.
18. Horvath A, Boikos S, Giatzakis C, et al. A genome-wide scan identifies mutations in the gene encoding phosphodiesterase 11A4 (PDE11A) in individuals with adrenocortical hyperplasia. *Nat Genet.* 2006;38(7):794-800. doi:10.1038/ng1809.
19. Gerding WM, Schreiber S, Schulte-Middelmann T, et al. Ccdc66 null mutation causes retinal degeneration and dysfunction. *Hum Mol Genet.* 2011;20(18):3620-3631. doi:10.1093/hmg/ddr282.
20. Deiss LP, Feinstein E, Berissi H, Cohen O, Kimchi A. Identification of a novel serine/threonine kinase and a novel 15-kD protein as potential mediators of the gamma interferon-induced cell death. *Genes Dev.* 1995;9(1):15-30.
21. Jia Y, Ye L, Ji K, et al. Death associated protein 1 is correlated with the clinical outcome of patients with colorectal cancer and has a role in the regulation of cell death. *Oncol Rep.* 2014;31(1):175-182. doi:10.3892/or.2013.2866.
22. Wazir U, Jiang WG, Sharma AK, Mokbel K. The mRNA expression of DAP1 in human breast cancer: correlation with clinicopathological parameters. *Cancer Genomics Proteomics.* 2012;9(4):199-201.
23. Noguchi K, Okumura F, Takahashi N, et al. TRIM40 promotes neddylation of IKK $\gamma$  and is downregulated in gastrointestinal cancers. *Carcinogenesis.* 2011;32(7):995-1004. doi:10.1093/carcin/bgr068.
24. Bauer S, Groh V, Wu J, et al. Activation of NK cells and T cells by NKG2D, a

- receptor for stress-inducible MICA. *Science*. 1999;285(5428):727-729.
25. Groh V, Rhinehart R, Randolph-Habecker J, Topp MS, Riddell SR, Spies T. Costimulation of CD8 $\alpha$  T cells by NKG2D via engagement by MIC induced on virus-infected cells. *Nature immunology*. 2001;2(3):255-260. doi:10.1038/85321.
  26. He S, Mention J-J, Monteiro RC, et al. A direct role for NKG2D/MICA interaction in villous atrophy during celiac disease. *Immunity*. 2004;21(3):367-377. doi:10.1016/j.immuni.2004.06.018.
  27. DiPilato LM, Ahmad F, Harms M, Seale P, Manganiello V, Birnbaum MJ. The Role of PDE3B Phosphorylation in the Inhibition of Lipolysis by Insulin. *Mol Cell Biol*. 2015;35(16):2752-2760. doi:10.1128/MCB.00422-15.
  28. Ahmad F, Chung YW, Tang Y, et al. Phosphodiesterase 3B (PDE3B) regulates NLRP3 inflammasome in adipose tissue. *Sci Rep*. 2016;6(1):28056. doi:10.1038/srep28056.
  29. Chung YW, Lagranha C, Chen Y, et al. Targeted disruption of PDE3B, but not PDE3A, protects murine heart from ischemia/reperfusion injury. *Proc Natl Acad Sci USA*. 2015;112(17):E2253-E2262. doi:10.1073/pnas.1416230112.
  30. Tsuchikane E, Fukuhara A, Kobayashi T, et al. Impact of cilostazol on restenosis after percutaneous coronary balloon angioplasty. *Circulation*. 1999;100(1):21-26.
  31. Regard JB, Scheek S, Borbiev T, et al. Verge: a novel vascular early response gene. *J Neurosci*. 2004;24(16):4092-4103. doi:10.1523/JNEUROSCI.4252-03.2004.
  32. Rice GI, Del Toro Duany Y, Jenkinson EM, et al. Gain-of-function mutations in IFIH1 cause a spectrum of human disease phenotypes associated with upregulated type I interferon signaling. *Nat Genet*. 2014;46(5):503-509. doi:10.1038/ng.2933.
  33. Stuart PE, Nair RP, Tsoi LC, et al. Genome-wide Association Analysis of Psoriatic Arthritis and Cutaneous Psoriasis Reveals Differences in Their Genetic Architecture. *Am J Hum Genet*. 2015;97(6):816-836. doi:10.1016/j.ajhg.2015.10.019.
  34. Jin Y, Andersen G, Yorgov D, et al. Genome-wide association studies of autoimmune vitiligo identify 23 new risk loci and highlight key pathways and regulatory variants. *Nat Genet*. 2016;48(11):1418-1424. doi:10.1038/ng.3680.
  35. Nejentsev S, Walker N, Riches D, Egholm M, Todd JA. Rare variants of IFIH1, a gene implicated in antiviral responses, protect against type 1 diabetes. *Science*. 2009;324(5925):387-389. doi:10.1126/science.1167728.
  36. Chauhan S, Goodwin JG, Chauhan S, et al. ZKSCAN3 is a master transcriptional



repressor of autophagy. *Mol Cell*. 2013;50(1):16-28.  
doi:10.1016/j.molcel.2013.01.024.

37. Yang L, Hamilton SR, Sood A, et al. The previously undescribed ZKSCAN3 (ZNF306) is a novel “driver” of colorectal cancer progression. *Cancer Res*. 2008;68(11):4321-4330. doi:10.1158/0008-5472.CAN-08-0407.
38. Maguire J, Santoro T, Jensen P, Siebenlist U. Gem: an induced, immediate early protein belonging to the Ras family. *SCIENCE-NEW YORK* .... 1994.
39. Béguin P, Nagashima K, Gonoï T, et al. Regulation of Ca<sup>2+</sup> channel expression at the cell surface by the small G-protein kir/Gem. *Nature*. 2001;411(6838):701-706. doi:10.1038/35079621.
40. Gautron S, Daegelen D, Menecier F, Dubocq D, Kahn A, Dreyfus JC. Molecular mechanisms of McArdle's disease (muscle glycogen phosphorylase deficiency). RNA and DNA analysis. *J Clin Invest*. 1987;79(1):275-281. doi:10.1172/JCI112794.
41. Tsujino S, Shanske S, DiMauro S. Molecular genetic heterogeneity of myophosphorylase deficiency (McArdle's disease). *N Engl J Med*. 1993;329(4):241-245. doi:10.1056/NEJM199307223290404.
42. Myocardial Infarction Genetics and CARDIoGRAM Exome Consortia Investigators. Coding Variation in ANGPTL4, LPL, and SVEP1 and the Risk of Coronary Disease. *N Engl J Med*. 2016;374(12):1134-1144. doi:10.1056/NEJMoa1507652.
