# Supplementary material for: Analysis of predicted loss-of-function variants in UK Biobank identifies variants protective for disease
Source: PubMed Central journal article supplement (PMC5915445; doi:10.1038/s41467-018-03911-8), 2018-04-24
Supplement: 41467_2018_3911_MOESM2_ESM.pdf [file 41467_2018_3911_MOESM2_ESM.pdf]

## **Description of Additional Supplementary Files**

File Name: Supplementary Data 1

Description: Results of conditional analysis to identify independent variants at loci (+ 500 kb) where rare and low frequency loss of function variants associate with phenotypes in UK Biobank

File Name: Supplementary Data 2

Description: Results of conditional analysis to identify independent variants at loci (+ 500 kb) where common loss of function variants associate with phenotypes in UK Biobank.
